# Supplementary material for: A Long-Term Cultivation of an Anaerobic Methane-Oxidizing Microbial Community from Deep-Sea Methane-Seep Sediment Using a Continuous-Flow Bioreactor
Source: PubMed Central journal article supplement (PMC4139340; doi:10.1371/journal.pone.0105356), 2014-08-20
Supplement: pone.0105356.s001.pdf [file pone.0105356.s001.pdf]

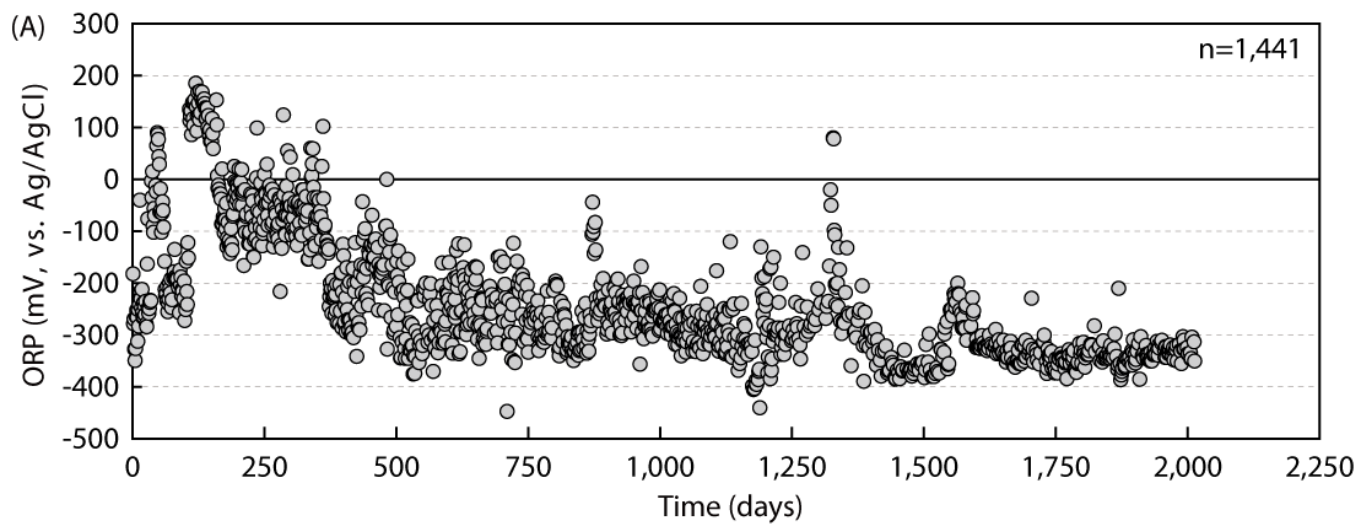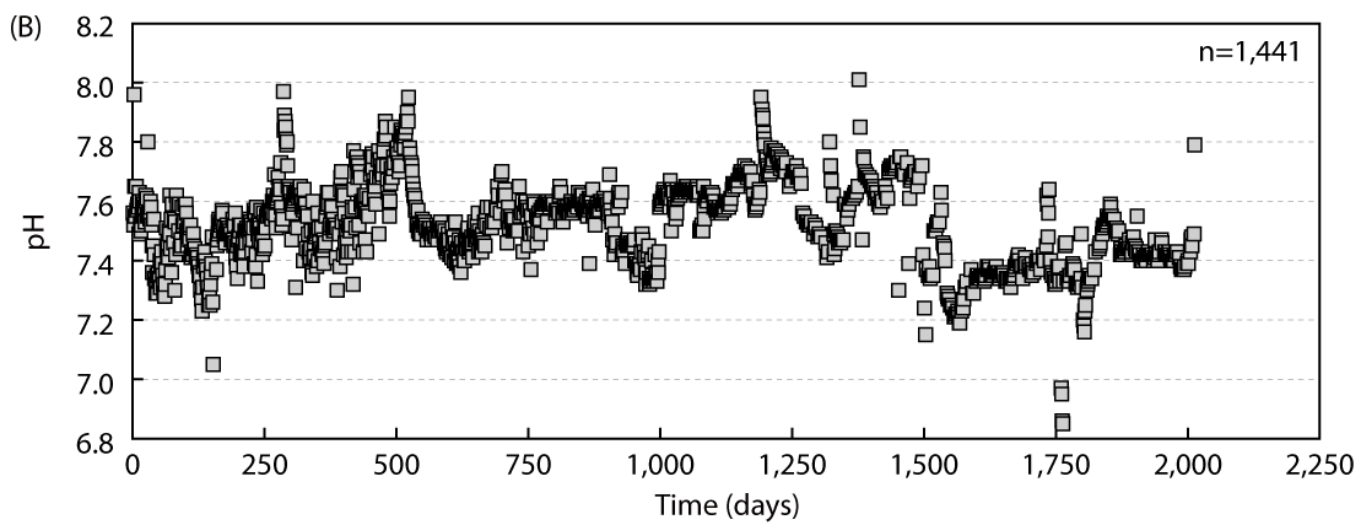

**Figure S1.** Aoki *et al.*
