# Supplementary material for: A Long-Term Cultivation of an Anaerobic Methane-Oxidizing Microbial Community from Deep-Sea Methane-Seep Sediment Using a Continuous-Flow Bioreactor
Source: PubMed Central journal article supplement (PMC4139340; doi:10.1371/journal.pone.0105356), 2014-08-20
Supplement: pone.0105356.s010.pdf [file pone.0105356.s010.pdf]

**Table S1** Oligonucleotide primers used in this study.

| primer               | Target                               | Primer sequence (5' to 3')                 | Reference |
|----------------------|--------------------------------------|--------------------------------------------|-----------|
| Arch21F              | Archaeal 16S rRNA gene               | TTC CGG TTG ATC CYG CCG GA                 | [1]       |
| 340F <sup>a</sup>    | Archaeal 16S rRNA gene               | CCY TAY GRG GYG CAS CAG G                  | [2]       |
| Ar912r <sup>a</sup>  | Archaeal 16S rRNA gene               | CCC CCG CCA ATT CCT TTA A                  | [3, 4]    |
| 932R                 | Archaeal 16S rRNA gene               | GCY CYC CCG CCA ATT CMT TTA                | [5]       |
| 27F                  | Bacterial 16S rRNA gene              | AGA GTT TGA TCM TGG CTC AG                 | [6]       |
| EUB338F <sup>b</sup> | Bacterial 16S rRNA gene              | ACT CCT ACG GGA GGC AGC                    | [7]       |
|                      |                                      | ACT CCT ACG GGA GGC TGC                    | [8]       |
|                      |                                      | ACA CCT ACG GGT GGC TGC                    | [8]       |
|                      |                                      | ACA CCT ACG GGT GGC AGC                    | [8]       |
| 907R <sup>a</sup>    | Bacterial 16S rRNA gene              | CCG TCA ATT CMT TTR AGT T                  | [6]       |
| 1492R <sup>a</sup>   | Archaeal and bacterial 16S rRNA gene | GGH TAC CTT GTT ACG ACT T                  | [6]       |
| MLf                  | <i>mcrA</i> gene                     | GGT GGT GTM GGA TTC ACA CAR TAY GCW ACA GC | [9]       |
| MLr                  | <i>mcrA</i> gene                     | TTC ATT GCR TAG TTW GGR TAG TT             | [9]       |

<sup>a</sup>These primers are a slightly modified version of the original designed primers.

<sup>b</sup>This primer consisted of a mixture of four primers at an equal amount (mol).

#### References

- DeLong, EF (1992) Archaea in coastal marine environments. *Proc. Natl. Acad. Sci. U. S. A.* 89:5685–5689.
- Gantner, S, Andersson, AF, Alonso-Sáez, L, Bertilsson, S (2011) Novel primers for 16S rRNA-based archaeal community analyses in environmental samples. *J. Microbiol. Methods* 84:12–18.
- Großkopf, R, Janssen, PH, Liesack, W (1998) Diversity and structure of the methanogenic community in anoxic rice paddy soil microcosms as examined by cultivation and direct 16S rRNA gene sequence retrieval. *Appl. Environ. Microbiol.* 64:960–969.
- Lueders, T, Friedrich, M (2000) Archaeal population dynamics during sequential reduction processes in rice field soil. *Appl. Environ. Microbiol.* 66:2732–2742.
- Murakami, S, Fujishima, K, Tomita, M, Kanai, A (2012) Metatranscriptomic analysis of microbes in an Oceanfront deep-subsurface hot spring reveals novel small RNAs and type-specific tRNA degradation. *Appl. Environ. Microbiol.* 78:1015–1022.
- Lane DJ (1991) 16S/23S rRNA sequencing. In: Stackebrandt E, Goodfellow M, editors. *Nucleic acid techniques in bacterial systematics*. New York, NY: John Wiley & Sons. pp. 115-175.
- Amann, RI, Binder, BJ, Olson, RJ, Chisholm, SW, Devereux, R, et al. (1990) Combination of 16S rRNA-targeted oligonucleotide probes with flow cytometry for analyzing mixed microbial populations. *Appl. Environ. Microbiol.* 56:1919–1925.
- Daims, H, Brühl, A, Amann, R, Schleifer, K-H, Wagner, M (1999) The domain-specific probe EUB338 is insufficient for the detection of all *Bacteria*: development and evaluation of a more comprehensive probe set. *Syst. Appl. Microbiol.* 22:434–444.
- Luton, PE, Wayne, JM, Sharp, RJ, Riley, PW (2002) The *mcrA* gene as an alternative to 16S rRNA in the phylogenetic analysis of methanogen populations in landfill. *Microbiology* 148:3521–3530.
