# Supplementary material for: A Long-Term Cultivation of an Anaerobic Methane-Oxidizing Microbial Community from Deep-Sea Methane-Seep Sediment Using a Continuous-Flow Bioreactor
Source: PubMed Central journal article supplement (PMC4139340; doi:10.1371/journal.pone.0105356), 2014-08-20
Supplement: pone.0105356.s012.pdf [file pone.0105356.s012.pdf]

**Table S3** Summary of FISH and CARD-FISH results.

| Probe       | Target group                                 | Sample/Detection method |           |                  |           |
|-------------|----------------------------------------------|-------------------------|-----------|------------------|-----------|
|             |                                              | 903-day sample          |           | 2,013-day sample |           |
|             |                                              | FISH                    | CARD-FISH | FISH             | CARD-FISH |
| ARC915      | Most <i>Archaea</i>                          | +                       | +         | +                | +         |
| ANME-1-350  | ANME-1                                       | +                       | NT        | +                | NT        |
| ANME-2a-647 | ANME-2a                                      | -                       | +         | -                | +         |
| ANME-2c-760 | ANME-2c                                      | -                       | +         | -                | -         |
| ANME-3-1249 | ANME-3                                       | -                       | NT        | -                | NT        |
| MBGD-318    | MBG-D                                        | -                       | +         | -                | +         |
| MBGB-380    | DSAG                                         | -                       | +         | -                | +         |
| MCOCID442   | <i>Methanococcoides</i>                      | +                       | NT        | +                | NT        |
| EUB338      | Most <i>Bacteria</i>                         | +                       | +         | +                | +         |
| Mγ669       | <i>Methylobacter</i> and <i>Methylomonas</i> | +                       | NT        | +                | NT        |
| UncGam731   | Gammaproteobacterial phylotype MK903D_B5     | +                       | NT        | +                | NT        |

+: detected, -: not detected, NT: not tested.
